# Supplementary material
Source: publisher figshare collection journal article supplement (https://gsajournals.figshare.com/articles/dataset/_/14049398)
Supplement: Supplementary file 1 [file 1]

## Supplemental information

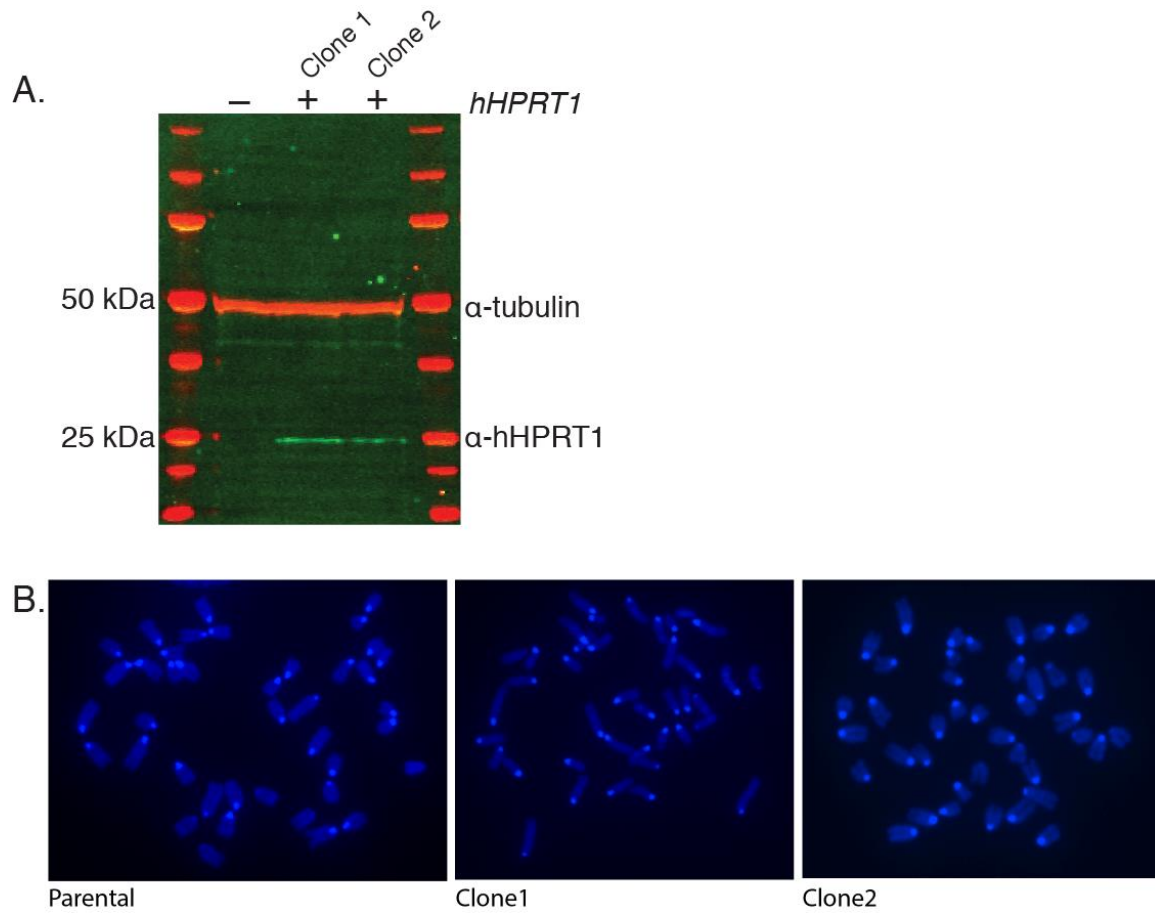

**Supplementary Fig. 1. *hHPRT1* clone characterization.** (a) Western blot analysis for *hHPRT1* protein expression in mouse ES cells using a human HPRT-specific monoclonal antibody. Parental mES (–) and *hHPRT1* clones 1 and 2 (+) were used. (b) Representative metaphase spreads from parental mESCs and *hHPRT1* clones 1 and 2.

**Supplemental Table 1: List of primers used to produce *HPRT1* amplicons**

| For primer | Sequence                                 | Rev primer | Sequence                                  |
|------------|------------------------------------------|------------|-------------------------------------------|
| HPR T.F1   | gcggccgcTCCCATTACCATGGACAGTGTGCTT        | HPRT .R1   | gcggccgcGACCAGCATAATTCAGTACCCATGTT        |
| HPR T.F2   | gcggccgcGGTCAGTTACATGAAACAAGATGAAGTCA    | HPRT .R2   | gcggccgcTGTTTGTAATAGTTTCTAGGTACTATAATGGGA |
| HPR T.F3   | gcggccgcGTCCATTAATTACTTCTTGATACTACTGACCT | HPRT .R3   | gcggccgcGGGCTTGGAATCTTGACTAAAATTCTCC      |
| HPR T.F4   | gcggccgcCAGTAATATCCAGGGGTAATGGAGG        | HPRT .R4   | gcggccgcCAGTCACAAGTTAAGGTGAAAACA          |
| HPR T.F5   | gcggccgcGAAGGAAAGAGTACA AACTATTTGGTTCAG  | HPRT .R5   | gcggccgcGCACAATTCCTTCCTTGATGGT            |
| HPR T.F6   | gcggccgcATGATTCTGGGATACAAAATCCCTGG       | HPRT .R6   | gcggccgcTACAGTATCTTACACCCAAACCATCT        |
| HPR T.F7   | gcggccgcCCTAATTATTTCTAATACATGTCCTACCCC   | HPRT .R7   | gcggccgcGCTTAAATAATGCACCC TATCATTATTTAG   |
| HPR T.F8   | gcggccgcTCTTACATTGAGAAA AACTGTATTTTCAAT  | HPRT .R8   | gcggccgcCTTGTGTGTGTACTTTTCAATTAAGAAGTGA   |
| HPR T.F9   | gcggccgcCAGCTTCAGAATTCAACTTGCTTATAATTC   | HPRT .R9   | gcggccgcTACAGTGGTATAAGGTATGGGGACG         |
| HPR T.F10  | gcggccgcGTATGGCCTTAGACTATTCAGAACGTTA     | HPRT .R10  | gcggccgcacatgggggtgtaaaattgaaccataattgg   |
| HPR T.F11  | gcggccgcggggtcacagggaagactttg            | HPRT .R11  | gcggccgcACAGTACAGTCAGCAATGGA              |
| HPR T.F12  | gcggccgcGAAATGGTGTGCTGGAGCAAC            | HPRT .R12  | gcggccgcTTGGCAGAATTAAGTAAGTTGATGTTT       |
| HPR T.F13  | gcggccgcctcGAGTAATACCAGTTAAAAAATAGGCTAC  | HPRT .R13  | gcggccgcGAATGGGCAGAAATTGCTAGTTGG          |
| HPR T.F14  | gcggccgcCACAATTATCCAAGGAGATGGCG          | HPRT .R14  | gcggccgcATCTACCTTGATTAAGGCAGTGTGC         |
| HPR T.F15  | gcggccgcTATGCCTTTCCCACTAGATTTTAAGC       | HPRT .R15  | gcggccgcTATGCCAGATCCTCTAGGATTAATGC        |
| HPR T.F16  | gcggccgcAGCAAGGTTTGTATTTTCCTAGAACTTG     | HPRT .R16  | gcggccgcCAATCCCAAATCCAAACAGCCT            |
| HPR T.F17  | gcggccgcGATGACACTTCATGAGTTGACTATAATAATC  | HPRT .R17  | gcggccgcGCATATAGTATACATGCATAGCCAGTG       |
| HPR T.F18  | gcggccgcGTATTGAATGCTTGCA TTGTATGTCT      | HPRT .R18  | gcggccgcGCTTTGCTTATGTTTAA GATGTCATGC      |
| HPR T.F19  | gcggccgcATAAGATCAATTCTGAGTGGTAGAAATGc    | HPRT .R19  | gcggccgcCACCATAATGCAGACTAATTTTCCCTC       |
| HPR T.F20  | gcggccgcCCAAAAAACAACAAAGCCTCAGGA         | HPRT .R20  | gcggccgcTCAACCATTCTCTGTCC TTTAACTG        |
| HPR T.F21  | gcggccgcACCTGAGCATATGTCC TTTCATACTTA     | HPRT .R21  | gcggccgcCAAGGATATGTCCCTCAAAAGTCTAGC       |

|              |                                            |              |                                               |
|--------------|--------------------------------------------|--------------|-----------------------------------------------|
| HPR<br>T.F22 | gcggccgcCCATTGAATCTCCTGT<br>AAGGGTTTTATTG  | HPRT<br>.R22 | gcggccgcACTGCAGCCTATTGGTA<br>GCCTA            |
| HPR<br>T.F23 | gcggccgcTACTGGGACCTCATAC<br>AAATGGGA       | HPRT<br>.R23 | gcggccgcGGTCCAAGTGAATTGAA<br>GAGGAAA          |
| HPR<br>T.F24 | gcggccgcatCACTGTCTAACAGC<br>CTCTCTTt       | HPRT<br>.R24 | gcggccgcAACAGCATAGGTAAGG<br>TGAGGAG           |
| HPR<br>T.F25 | gcggccgcGATTCCAAAGCGGGT<br>GAGGAAG         | HPRT<br>.R25 | gcggccgcAACCCAAATGCTGCCTG<br>TTGA             |
| HPR<br>T.F26 | gcggccgcGCCCTTTCAGCTCTT<br>TAAACATATA      | HPRT<br>.R26 | gcggccgcCCAGTTTCACTAATGAC<br>ACAAACATGC       |
| HPR<br>T.F27 | gcggccgcAAGATACACTCCCCA<br>AAAGTTACTGA     | HPRT<br>.R27 | gcggccgcAGCCAGCAGAAAAATC<br>TGAAGAG           |
| HPR<br>T.F28 | gcggccgcAGTCCAGATGACTTGT<br>ACATTAAACAC    | HPRT<br>.R28 | gcggccgcGTGCCGAATTTGGTTAC<br>TCCTTT           |
| HPR<br>T.F29 | gcggccgcACCTGGCCTTTGGAAC<br>TTGG           | HPRT<br>.R29 | gcggccgcATCAGGGGGAAATGTT<br>ATTTATCATGAA      |
| HPR<br>T.F30 | gcggccgcaGTTTCTTCCAGGGTG<br>GCTTCT         | HPRT<br>.R30 | gcggccgcTGTCTTTGCCTGTGTTT<br>TTAGGAA          |
| HPR<br>T.F31 | gcggccgcAGCACCACAAAGTTA<br>GAGGTCAA        | HPRT<br>.R31 | gcggccgcAAGCATTATATCAGAAA<br>CAGAAAAATAATCATC |
| HPR<br>T.F32 | gcggccgcCTCACTGAATGAGGC<br>AGGTAGC         | HPRT<br>.R32 | gcggccgcaagACTTATTTCTAGTAT<br>TTTCTTCATGATCG  |
| HPR<br>T.F33 | gcggccgcGGAGAGAGAAGGCAT<br>AAACAATATTAATAA | HPRT<br>.R33 | gcggccgcaaaGCTGAGGAGAAAAA<br>TAAAAAGAATAC     |
| HPR<br>T.F34 | gcggccgcTTTGAGAAACAGCC<br>CACCACC          | HPRT<br>.R34 | gcggccgcaatGGTATGGGAGAATTG<br>GGTTA           |
| HPR<br>T.F35 | gcggccgctgCTGTGGATCGTTCA<br>GCATGT         | HPRT<br>.R35 | gcggccgccACGAAGCATAAATTTT<br>TCCACAAA         |
| HPR<br>T.F36 | gcggccgcGGTTATGTTCACTTCA<br>TTTGGTTACAG    | HPRT<br>.R36 | gcggccgcAAAGATAATAAAATAC<br>CTCACATCATGAAtg   |
| HPR<br>T.F37 | gcggccgcacGGTGTCTTAAATCTT<br>TATGTGTTTG    | HPRT<br>.R37 | gcggccgcCCATAATTAAATGTCTG<br>TGTTCTGGTC       |
| HPR<br>T.F38 | gcggccgcgcttcactctaaaatgatTGGAC<br>CATg    | HPRT<br>.R38 | gcggccgcCATGGTGAGCGAGGTG<br>AGGC              |

**Supplemental Table 2: Yeast strains used in this study**

| Yeast strain | Genotype                                      | Description                               | Reference                      |
|--------------|-----------------------------------------------|-------------------------------------------|--------------------------------|
| BY4741       | <i>MATa LYS2 met15Δ0 ura3Δ0 his3Δ1 leu2Δ0</i> | Wild-type lab strain for yeast assemblies | (BRACHMANN <i>et al.</i> 1998) |
| yLM1227      | BY4741 + <i>HPRT1 step 1::URA3</i>            | <i>HPRT1</i> assembly step 1, isolate 1   | This study                     |
| yLM1228      | BY4741 + <i>HPRT1 step 1::URA3</i>            | <i>HPRT1</i> assembly step 1, isolate 2   | This study                     |
| yLM1229      | yLM1227 + <i>HPRT1 step 2::LEU2</i>           | <i>HPRT1</i> assembly step 2, isolate 1   | This study                     |
| yLM1231      | yLM1228 + <i>HPRT1 step 2::LEU2</i>           | <i>HPRT1</i> assembly step 2, isolate 2   | This study                     |
| yLM1234      | yLM1229 + <i>HPRT1 step3::URA3</i>            | <i>HPRT1</i> assembly step 3, isolate 1   | This study                     |
| yLM1235      | yLM1231 + <i>HPRT1 step3::URA3</i>            | <i>HPRT1</i> assembly step 3, isolate 2   | This study                     |

**Supplemental Table 3: Plasmids used in this study**

| Plasmid           | Description                                                           | Length (kb) | Reference                                                  |
|-------------------|-----------------------------------------------------------------------|-------------|------------------------------------------------------------|
| pLM453            | eSwAP-In assembly vector                                              | 11          | This study                                                 |
| pLM718,<br>pLM719 | <i>HPRT1</i> step 1, recovered from yLM1227 and yLM1228, respectively | 46          | This study                                                 |
| pLM747,<br>pLM749 | <i>HPRT1</i> step 2, recovered from yLM1229 and 1231, respectively    | 82          | This study                                                 |
| pLM750,<br>pLM751 | <i>HPRT1</i> step 3, recovered from yLM1234 and yLM1235, respectively | 112         | This study                                                 |
| pLM707            | ICE loxP-loxM cassette                                                | 4.5         | (IACOVINO <i>et al.</i> 2011; IACOVINO <i>et al.</i> 2014) |
| pLM854            | pLM453 + loxP-loxM cassette                                           | 13          | This study                                                 |
| pLM848            | pLM718 + loxP-loxM cassette                                           | 48          | This study                                                 |
| pLM881            | pLM747 + loxP-loxM cassette                                           | 84          | This study                                                 |
| pLM886            | pLM750 + loxP-loxM cassette                                           | 114         | This study                                                 |

**Supplemental Table 4: qRT-PCR primers**

| Target                | Forward primer          | Rev primer             |
|-----------------------|-------------------------|------------------------|
| Mouse<br><i>Gapdh</i> | AGAACATCATCCCTGCATCC    | CACATTGGGGGTAGGAACAC   |
| Mouse<br><i>Nanog</i> | TTTCAGAAATCCCTTCCCTCG   | TGATGAGGCGTTCCCAGAAT   |
| Mouse<br><i>Esrrb</i> | CAGGCAAGGATGACAGACG     | GAGACAGCACGAAGGACTGC   |
| Mouse <i>Tcl1</i>     | AAATTCCAGGTGATCTTGCG    | TGTCCTTGGGGTACAGTTGC   |
| Mouse<br><i>Gata6</i> | TTGCTCCGTAACAGCAGTG     | GTGGTCGCTTGTGTAGAAGGA  |
| Mouse <i>T</i>        | GCTTCAAGGAGCTAACTAACGAG | CCAGCAAGAAAGAGTACATGGC |
| Mouse<br><i>Pax3</i>  | GCAGCGCAGGAGCAGAACCA    | GCACTCGGGCCTCGGTAAGC   |
| Mouse<br><i>Hand1</i> | CCCCTCTTCCGTCCTCTTAC    | CTGCGAGTGGTCACACTGAT   |
| Human<br><i>HPRT1</i> | GACCAGTCAACAGGGGACAT    | CCTGACCAAGGAAAGCAAAG   |

**References:**

- Brachmann, C. B., A. Davies, G. J. Cost, E. Caputo, J. Li *et al.*, 1998 Designer deletion strains derived from *Saccharomyces cerevisiae* S288C: a useful set of strains and plasmids for PCR-mediated gene disruption and other applications. *Yeast* 14: 115-132.
- Iacovino, M., D. Bosnakovski, H. Fey, D. Rux, G. Bajwa *et al.*, 2011 Inducible cassette exchange: a rapid and efficient system enabling conditional gene expression in embryonic stem and primary cells. *Stem Cells* 29: 1580-1588.
- Iacovino, M., M. E. Roth and M. Kyba, 2014 Rapid genetic modification of mouse embryonic stem cells by Inducible Cassette Exchange recombination. *Methods Mol Biol* 1101: 339-351.
